# Supplementary material for: A guide for Physiotherapeutic assistance during pregnancy, labour, and the postpartum period in times of COVID-19
Source: Research Square preprint supplement (doi:10.21203/rs.3.rs-154738/v1), 2021-02-12
Supplement: Supplementary file 1 [file 0b37b5b86274da797e499fe6.docx]

| **Box 1.** General Recommendations [1, 32-35] |
| --- |
| Pregnant women who have good general health status and fever ≥38°C (100.4°F) or one or more symptoms like cough, difficulty breathing or shortness of breath, chills, repeated shaking with chills, headache, sore throat, the new loss of taste or smell, unprotected exposure to known COVID-positive individual, fatigue, muscle or body aches congestion or runny nose, nausea or vomiting, and diarrhea should be recommend testing for SARS-CoV-2 infection and instructed to immediately contact the healthcare provider or equivalent unit that treats pregnant women. When possible, send the women to a setting where she can be isolated; |
| Pregnant women with mild clinical manifestations of COVID-19 may initially not require hospitalization, and home isolation is recommended, provided that it is logistically possible and that their health conditions can be monitored, with the guidance of warning signs and protection/isolation, without compromising the safety of their family; |
| Prenatal care professionals also should ponder the possibility of a reduced health care workforce, a potential shortage of personal protective equipment, and restricted isolation rooms, and should maximize the use of [telehealth](https://www.acog.org/clinical-information/physician-faqs/covid-19-faqs-for-ob-gyns-telehealth)  across as many aspects of prenatal care as possible; |
| Pregnant women with confirmed COVID-19 who are asymptomatic, mild cases and those who are recovering should be monitored by the primary care team, according to the home isolation protocol, for at least 10 days since symptoms first appeared and at least 24 hours with no fever without fever-reducing medication and other symptoms of COVID-19 are improving. Loss of taste and smell may persist for weeks or months after recovery and need not delay the end of isolation​; |
| Pregnant women in home isolation who present dyspnea or worsening of flu symptoms should be instructed to seek an emergency health service; |
| The instructions given to pregnant women should be precise, since there is a possibility that they will become resistant to seeking health services even when they need care, which can lead to a lack of care, including the potential to increase maternal death rates; |
| Under no circumstances should pregnant women abandon or skip healthcare appointments; |
| The main guidelines recommend that women in labor in good general conditions, without respiratory restriction and high oxygenation rate have the same indications regarding the mode of delivery, that is, the elective cesarean sections and unnecessary induction should be avoided; |
| Visitors should be limited to those essential for the pregnant person’s well-being and care (emotional support persons). When allowed companionship during labor, they should circulate as little as possible, using a surgical mask in the maternity hospital environments. Depending upon the extent of community-transmission, institutions may consider limiting visitors to one essential support person and having that person be the same individual throughout the hospitalization; |
| There is no consensus on whether skin-to-skin contact between mother and baby shortly after delivery is contraindicated. The numerous benefits of skin-to-skin contact outweigh the potential risks of transmission and disease associated with COVID-19; |
| As for breastfeeding, so far there is no consistent evidence of vertical transmission during this process and should be stimulated; |
| If the woman does not feel safe to breastfeed while infected with COVID-19, it is recommended that her milk be removed and offered to the child; to prevent transmission during breastfeeding in infected or symptomatic women, the following precautions are recommended:  Wash your hands for at least 20 seconds before touching the baby or before removing breast milk (manual extraction or on the extractor pump), wear a face mask (completely covering the nose and mouth) during feedings and, avoid talking or coughing during breastfeeding;  The mask used during breast-feeding by the postpartum woman should be changed immediately in case of coughing or sneezing or at each new feeding;  Strictly follow the recommendations for cleaning milk extraction pumps after each use;  Consideration should be given to the possibility of requesting the help of someone healthy to offer breast milk in a cup or spoon to the baby;  It is necessary that the person who will offer the milk to the baby learn to do the procedure with the help of a health professional. |

| **Box 2.** Physiotherapy care in obstetrics and the recommendations regarding personal protective equipment (PPE). |
| --- |
| It is important to highlight that the work of the physiotherapist should be maintained whenever possible, since providing the appropriate use of physiotherapeutic resources to labor and postpartum women result in pain relief and decreased labor, greater satisfaction with the labor experience, pain relief in the cesarean section, episiotomy incision and perineal lacerations, and better management of breastfeeding and their possible complications [7-15, 20, 21]. |
| To be maintained whenever possible, considering the epidemiological situation, the indications for physiotherapy care, availability of human resources and, adequate large physical space; |
| To enable and prioritize teleconsultation and telemonitoring when possible. Telephysiotherapy can also improve patient health outcomes [37]; |
| Consider face-to-face and individualized care in urgent cases that require physiotherapeutic evaluation for the use of analgesic and anti-inflammatory physical therapy resources that are not viable digitally and that cannot be replaced by another remote resource with the same clinical effect; |
| Women who have hearing, visual and cognitive disabilities that restrict remote care in which there is possible damage to the health and safety of pregnant women, should be attended in person; |
| Physiotherapists must protect themselves using appropriate safety PPE during patient care. Professionals should follow safety recommendations for the correct use of PPE for healthcare personnel. The CDC’s optimization strategies for PPE offer a continuum of options for use when PPE supplies are stressed, running low, or absent [38]. |

| **Box 3.** Safety of the service environment: |
| --- |
| Follow the specific recommendations of the Hospital Infection Control Commission (CCIH) when outpatient care occurs in this environment; |
| Limit the number of companions in the case of pregnant women with physical disabilities who need help; keeping only one companion who is not elderly or child in face-to-face care; |
| Avoid the entry of companions/visitors with respiratory symptoms. If necessary and there is the possibility of contact with body fluids, gloves should be provided for companions and guidance concerning hand hygiene; |
| Offer hand hygiene stations for patients to use before entering the unit or waiting room; |
| Avoid entering the service room with shoes that were used on the street. Guide the use of clean and brought anti-slip socks if possible, by the patient and companion, if applicable. |
| Maintain physical distancing in waiting for rooms with marking of floors, elevators, accents and, adequacy of furniture distribution; |
| Reinforce the constant cleaning of toilets, changing rooms, and points of great contact such as handrails, door handles, cardboard machines, elevators, tables, chairs, etc; |
| Focus on natural ventilation. In the case of an air conditioner, avoid air recirculation and check the adequacy of preventive and corrective maintenance; |
| Remove from the waiting room magazines, leaflets and, other objects (coffee machines, water dispensers) that can be handled by several persons. |

| **Box 4.** General aspects of care for pregnant women without symptoms of COVID-19: |
| --- |
| To use a surgical mask for physiotherapists and a social mask (e.g. cloth) for patients and companions in-personal care; |
| Individual service, at scheduled times, with intervals between these times, avoiding agglomerations in receptions and allowing sufficient time for the hygiene of the environment and equipment; |
| Prepare in advance all the material that will be used in the consultation to avoid the movement of people and the opening of drawers; |
| Remove all props, such as rings, bracelets, necklaces, earrings, and watches; |
| Keep nails natural, short and, clean; do not use artificial nails or other types of extenders, gel, or other nail products; |
| Clean and disinfect immediately after consultations all surfaces and the working environment; |

| **Box 5.** Specific aspects of care for pregnant women without symptoms of COVID-19: |
| --- |
| Maximize the use of all modalities of telephysiotherapy care (teleconsultation and telemonitoring) [39]; |
| The resumption of contact with patients can be made initially by telephone, as well as telemonitoring [39]; |
| A questionnaire can be used to assess the general health status of patients in this first contact (telephone), specific symptoms, availability/expectations for distance care; |
| Teleconsultation should prioritize aspects of patient self-report, preferably using simplified validated questionnaires; |
| Aspects of physical examination can be used at a distance such as self-monitoring of temperature by patients and inspection of respiratory rate; however, these findings should be interpreted with caution; |
| Some specific aspects of the distance physical examination involving the musculoskeletal system have good reliability and can be performed with caution, offering detailed explanations to patients including the postural evaluation and self-palpation of the musculoskeletal system; |
| Warning: Exposure of naked genitalia of patients and vaginal or anal self-palpation for self-examine of pelvic floor muscle function during video calls light stretching is not recommended; |
| It is important to avoid requesting images and videos involving exposure of women’s bodies for remote synchronous or asynchronous evaluation except their consent is obtained and they are informed about the privacy risks involved [40]; |
| Findings of physical examination at a distance should be interpreted with caution; |
| Teleconsultation may not be the ideal tool for a complete evaluation of pregnant women, but maybe the only resource in some situations, its limitations should be explained to the patient; |
| Telemonitoring is indicated for routine physiotherapeutic prenatal or postpartum care, prescription and, supervision of exercises for pregnant women in good general health, good visual and auditory acuity; |
| Sessions should offer quality care and may include postural, ergonomic orientations, exercises for physical conditioning, general kinesiotherapy, training of pelvic floor muscles and other muscle groups; |
| It is recommended to continue offering educational activities digitally, including preparation for childbirth and postpartum; |
| Educational materials should be organized by the professional and shared virtually (e-mail or digital platforms) with patients (leaflets, booklets, anatomical teaching materials, etc...) preferably before the care sessions; |
| Clear and empathetic communication with the patient through digital means and maximization of self-care guidelines and about changes in life habits are very important and feasible to be offered at a distance; |
| All care must be duly recorded in patients' medical records; |
| Consent should be obtained for online consultations. |

| **Box 6.** Care for pregnant women with COVID-19: |
| --- |
| Pregnant women with COVID-19 in asymptomatic home isolation or with mild symptoms of COVID-19 may require physiotherapeutic care related to discomforts of the musculoskeletal system and pain resulting from the adaptations of the maternal body to pregnancy; |
| The physiotherapist should undertake conducts that do not require physical effort on the part of the pregnant woman, guidelines and measures that seek their comfort and pain relief, mainly through general postural and ergonomic orientations, breathing exercises and, prescription of light stretching, maintaining the rest recommendations; |
| The general condition of patients should be constantly monitored; |
| It is important to have the contact of all regional services of reference to regular and emergency care for pregnant women with COVID-19 and specifically the contact of the place where the pregnant woman is receiving prenatal care; |
| It is important to discuss clinical cases in an interdisciplinary manner with the professional(s) who provide prenatal care to pregnant women. |

| **Box 7.** The practice of physical exercise in pregnant and postpartum women during the pandemic: |
| --- |
| There are no recommendations at this time to limit the practice of physical exercise in the asymptomatic population [19]. Pregnant women and postpartum women, so care should be the same as before the epidemic; |
| Physical exercise should be routinely indicated to low-risk pregnant women due to numerous benefits including the prevention of depressive disorders in the postpartum period, although some modifications may be necessary due to the anatomical and physiological adaptations of these periods [16]; |
| The safety of physical exercise has already been established in guidelines on the subject. Physical exercise should be encouraged during pregnancy as an important component of health [16]; |
| Generally speaking, at least 150-300 minutes per week of moderate-intensity aerobic activity is recommended. This activity should be distributed throughout the week [16, 19]; |
| It should be taken into account whether the woman had already performed physical exercise before pregnancy or if she was sedentary to determine the type and intensity of the exercise program [16]; |
| The evaluation, prescription, and supervision of exercises shall be carried out using teleconsultation and telemonitoring whenever possible [37, 39, 40]; |
| All safety recommendations should be known and applied to perform exercise during pregnancy and postpartum in the same way in digital care; |
| Moderate intensity exercises are the most indicated, however, the practice of exercise before pregnancy should be considered to indicate the type and intensity of the same [16]; |
| It is important to guide the patient on the use of perceived exertion classifications to monitor exercise intensity and on the "talk test"[16]; |
| In moderate exercise, the estimate of the effort by the pregnant woman should remain between 13-14 (slightly tiring) and the "talk test" should allow the woman to be able to speak and exercise at the same time [16]; |
| Women should be advised to remain well hydrated, avoid long periods of supine pain, and discontinue exercise if they have any of the warning signs (vaginal bleeding, abdominal pain, regular painful contractions, amniotic fluid leakage, dyspnea before exertion, dizziness, headache, chest pain, muscle weakness affecting balance, calf pain or swelling) [16]; |
| The physiotherapist should evaluate the safety conditions of the home environment (furniture, temperature, privacy for telemonitoring sessions and conducting unsupervised exercises, guiding necessary adaptations of the environment to perform the sessions; |
| Attention: Until scientific data are available on the repercussions of aerobic and resistance physical exercise in pregnant women and postpartum women infected with COVID-19, without symptoms or symptomatic, it is prudent to suspend their exercise practice during the days of isolation or total remission of symptoms; |
| Mild activities of daily living can be maintained during the period of social isolation for asymptomatic pregnant women with COVID-19, avoiding staying in bed for many hours during the day or in the same posture for more than one hour without taking breaks; |
| After periods of inactivity due to COVID-19 or not, pregnant women may be more vulnerable to injury in resuming physical exercise, the physiotherapist must guide a gradual resumption of exercise; |
| Physical exercise after a period of inactivity and recovery of COVID-19, shorter and more frequent sessions should be proposed, with a gradual increase, through periodic monitoring and reassessment, to reduce the likelihood of injury or other complications; |
| All warning signs and symptoms for interruption of physical exercises should be known by pregnant women and properly self-monitored or monitored using telephysiotherapy; |
| Warning: Pregnant women should be instructed to discontinue exercise in case of cough, fever, or shortness of breath; |
| Pregnant women at habitual risk may receive guidance on physical exercise during prenatal consultations through educational leaflets, telephone explanations, teleconsultation in a synchronic or asynchronous way, besides, virtual training groups may be constituted; |
| High-risk pregnant women with an indication for physical exercise at the outpatient level should receive real-time supervision and it is up to the physiotherapist to determine, based on the patient's evolution, the safety for her to exercise alone or following distance guidance asynchronously; |
| Social isolation should in no way keep pregnant women away from prenatal care [35, 36].The physiotherapist before indicating, prescribing and, supervising any exercise program should make sure that the pregnant woman is receiving prenatal care. Concerns that physical exercise during pregnancy may cause miscarriage, fetal growth restriction, musculoskeletal injury, or preterm delivery have not been scientifically proven in low-risk pregnancies [16]; |
| Greater physical and cardiorespiratory fitness are associated with lower levels of pain in general, low back pain, sciatica, and reduction of disability to pain [16]; |
| Rehabilitation can be initiated in the immediate postpartum period covering guidance and kinesiotherapy involving various muscle groups, including the pelvic floor. Abdominal muscle strengthening exercises have been indicated for the treatment of rectus abdominal muscle diastasis, however, they should be guided by a specialist physiotherapist [16]; |
| Aerobic exercise in breastfeeding women improves maternal cardiovascular conditioning without affecting milk production, milk composition, or infant growth and is usually started about forty days after delivery through the desire/availability of the postpartum woman, obstetrics clinical condition and, through thorough physical therapy evaluation. Women who are breastfeeding should consider feeding their babies or milking before exercising to avoid the discomfort of engorged breasts [16]. |

| **Box 8.** Physiotherapist's assistance in the maternity hospital with parturients and postpartum women, in general, is recommended: |
| --- |
| The physiotherapeutic assistance provided to parturients and stable postpartum women regardless of the status of contamination by COVID-19 is maintained safely, whenever possible; |
| The hygiene care and disinfection of the therapeutic resources used is doubled; |
| The sharing of therapeutic resources between the sectors that serve parturients and postpartum women with and without COVID-19 should be avoided; |
| Scales are organized in which physiotherapists working in the COVID-19 or non-COVID-19 sectors meet a fixed day in these maternity sectors; |
| It should be avoided that professionals provide care in several maternity hospitals; |
| The professional must follow the guidelines of the local and state health departments and institutional policies. Due to the risk of exposure to COVID-19 by the health team and patients, it may be necessary to modify policies according to specificities, standards, and teams defined in each institution; |
| In some maternity hospitals that have an insufficient number of hired physiotherapists, it may be necessary to relocate the work schedules in order not to interrupt the care, provide security to all and avoid excessive changes during the workday; |
| Physical therapy resources are offered for pain relief and labor progression and applied through physical therapy evaluation and in a safe way considering the general condition of the parturient and her preferences; |
| Interventions requiring physical exertion for symptomatic and dyspneic pregnant women are not used; |
| Women's health physiotherapists who work in maternity hospitals may need specific training to deal with respiratory aspects related to pregnant women and parturients with COVID-19. For safety recommendations, treatment recommendations, discharge recommendations, and staffing recommendations it is important to consult the specific guidance and detailed recommendations for hospital-based physical therapists managing patients hospitalized with COVID-19 [44]. |
| Physiotherapeutic guidance and interventions continue to be offered in the postpartum period safely and through specific physiotherapeutic evaluation; |
| The physiotherapist makes efforts with the team to encourage breastfeeding guiding the general safety measures to avoid the contact of newborns during breastfeeding, in addition to the use of all guidelines and physiotherapeutic resources for successful breastfeeding safely through evaluation; |
| Physiotherapists, as well as all health professionals, should be officially notified of any postpartum woman contracts the COVID-19. There should be a thorough screening, to identify the professionals who had contact with the patient, aiming at the protection of the professionals involved in the team. |
